# Supplementary material for: Physical basis of the cell size scaling laws
Source: eLife. 2023 May 2;12:e82490. doi: 10.7554/eLife.82490 (PMC10266764; doi:10.7554/eLife.82490)
Supplement: Figure 2—source data 1. [file elife-82490-fig2-data1.xlsx]

## Sheet: source_data_file
Figure 2 - Panel B (extracted from Fig.3 A in Neurohr et al Cell 2019)
Time in G1 arrest (h)	Volume (fL)									rho eau (kg/L)	initial averaged buoyant density (kg/L)
-0.000309715	32.5201									1.04	1.1069
0.5003	38.9992
0.750572	45.2875
1.01166	57.6816
1.01173	51.5841
1.03339	61.7632
1.26191	66.0024
1.51207	82.4533
1.51212	78.3883
1.54481	74.3481
1.77321	90.7824
2.01246	109.257
2.0125	105.192
2.01257	99.0949
2.26264	123.676
2.51269	150.289
2.51274	146.224
2.51287	134.029
2.76281	170.805
3.01282	201.483
3.01286	197.418
3.02399	175.069
3.27375	228.105
3.51281	264.873
3.51287	258.775
3.5131	238.45
3.76284	293.518
4.02357	338.433
4.02364	332.335
4.02384	314.043
4.26267	371.135
4.52341	416.049
4.52345	411.984
4.52363	395.724
4.77335	452.825
5.02315	501.796
5.0232	497.731
5.02333	485.536
5.30575	538.597
5.52288	589.575
5.52303	575.348
5.55564	579.438
6.02265	673.29
6.02267	671.257
6.02276	663.127
6.02305	636.705
6.52259	740.744
6.5227	730.581
6.52279	722.451
7.02234	826.491
7.03314	834.629
7.57638	924.474
