# Supplementary material for: Physical basis of the cell size scaling laws
Source: eLife. 2023 May 2;12:e82490. doi: 10.7554/eLife.82490 (PMC10266764; doi:10.7554/eLife.82490)
Supplement: Figure 2—source data 2. [file elife-82490-fig2-data2.xlsx]

## Sheet: source_data_file
Figure 2 - Panel C (extracted from Fig.3 B in Neurohr et al Cell 2019)
Volume (fL)	Growth rate (fL/h)							rho eau (kg/L)	initial averaged buoyant density (kg/L)
39.7163	28.7046							1.04	1.1069
46.8085	34.5508
48.227	37.737
49.6454	35.6153
58.156	40.9322
62.4113	39.8752
66.6667	44.6568
68.0851	39.3504
69.5035	42.5366
82.2695	51.5735
82.2695	53.1659
89.3617	53.1734
92.1986	56.8919
95.0355	49.9947
109.22	82.3877
112.057	70.1827
121.986	80.2781
126.241	80.8134
130.496	80.2872
151.773	84.0252
153.191	105.258
167.376	103.681
174.468	108.465
181.56	111.127
204.255	124.421
209.929	117.526
225.532	126.036
234.043	127.637
241.135	131.891
273.759	148.38
273.759	134.049
290.78	138.313
302.128	142.571
307.801	143.639
346.099	162.257
350.355	166.508
365.957	161.747
375.887	155.388
387.234	164.424
429.787	169.246
435.461	178.275
449.645	170.329
458.156	168.745
463.83	162.913
513.475	152.881
526.241	178.372
536.17	180.505
543.262	169.897
554.61	174.686
600	122.718
622.695	151.404
625.532	193.339
628.369	168.926
676.596	184.901
682.27	118.559
704.965	137.16
764.539	223.211
777.305	170.677
778.723	213.141
880.851	162.825
951.773	119.376
