# Supplementary material for: Physical basis of the cell size scaling laws
Source: eLife. 2023 May 2;12:e82490. doi: 10.7554/eLife.82490 (PMC10266764; doi:10.7554/eLife.82490)
Supplement: Figure 2—source data 3. [file elife-82490-fig2-data3.xlsx]

## Sheet: source_data_file
Figure 2 - Panel D
Time in G1 arrest (h)	Total Protein (relative to 1h)	error bars					initial averaged buoyant density (kg/L)
Replica 1 (extracted from Figure 3 panel D Neurohr et al Cell 2019)							1.1069
1.00089	1.11069	0
2.00144	1.79102	0.134228
3.00192	2.39064	0.187846
4.00274	3.42076	0.201379
5.00342	4.26253	0.308725
6.00362	4.51237	0.899329
7.0041	5.11199	0.751678
Replica 2 (extracted from Figure 3 panel C Neurohr et al Cell 2019)
1.00141	1.04748	NA
2.00283	2.12479	NA
2.99576	3.23185	NA
3.99717	4.16023	NA
4.99859	4.79073	NA
6	5.5106	NA
Replica 3 (extracted from Figure S5 panel C Neurohr et al Cell 2019)
1.00724	0.979022	0
2.00579	1.83626	0
2.99566	2.51085	0.247987
3.99421	3.79417	0.202899
5.00145	4.89493	0.439614
6	5.38696	0.867955
