# Supplementary material for: Physical basis of the cell size scaling laws
Source: eLife. 2023 May 2;12:e82490. doi: 10.7554/eLife.82490 (PMC10266764; doi:10.7554/eLife.82490)
Supplement: Figure 2—source data 4. [file elife-82490-fig2-data4.xlsx]

## Sheet: source_data_file
Figure 2 - Panel E (extracted from Fig.3 H in Neurohr et al Cell 2019)
Time in G1 arrest (h)	Buoyant mass density (kg/L) (raw data)	Normalized buoyant mass density	rho eau (kg/L)	initial averaged buoyant density (kg/L)
1.01431	1.11282	1.08842	1.04	1.1069
1.0177	1.10394	0.955789
1.20122	1.1031	0.943158
1.22428	1.10268	0.936842
1.31508	1.10479	0.968421
1.33782	1.10521	0.974737
1.51924	1.10986	1.04421
1.56875	1.10014	0.898947
1.60988	1.11239	1.08211
1.6123	1.10606	0.987368
1.61455	1.10014	0.898947
1.65519	1.11366	1.10105
1.67906	1.11113	1.06316
1.68116	1.10563	0.981053
1.72631	1.10732	1.00632
1.77066	1.11113	1.06316
1.77308	1.10479	0.968421
1.77502	1.09972	0.892632
1.79598	1.10479	0.968421
1.79695	1.10225	0.930526
1.81936	1.10352	0.949474
1.84291	1.10183	0.924211
1.86388	1.1069	1
1.86533	1.1031	0.943158
1.86678	1.0993	0.886316
1.86726	1.09803	0.867368
1.88694	1.10648	0.993684
1.90919	1.10817	1.01895
1.95709	1.10268	0.936842
1.95806	1.10014	0.898947
1.95919	1.09718	0.854737
1.97854	1.10648	0.993684
1.98128	1.0993	0.886316
1.9995	1.11155	1.06947
2.00095	1.10775	1.01263
2.00305	1.10225	0.930526
2.00353	1.10099	0.911579
2.06965	1.10775	1.01263
2.09417	1.10352	0.949474
2.09481	1.10183	0.924211
2.11755	1.10225	0.930526
2.14174	1.09887	0.88
2.16174	1.10648	0.993684
2.16416	1.10014	0.898947
2.16432	1.09972	0.892632
2.18577	1.10352	0.949474
2.23254	1.10099	0.911579
2.27221	1.11704	1.15158
2.27301	1.11493	1.12
2.3014	1.10056	0.905263
2.32188	1.1069	1
2.32204	1.10648	0.993684
2.34559	1.10479	0.968421
2.3472	1.10056	0.905263
2.36397	1.11662	1.14526
2.36881	1.10394	0.955789
2.36929	1.10268	0.936842
2.4159	1.10056	0.905263
2.43348	1.11451	1.11368
2.48218	1.1069	1
2.52927	1.10352	0.949474
2.53105	1.09887	0.88
2.53137	1.09803	0.867368
2.55072	1.10732	1.00632
2.55249	1.10268	0.936842
2.55459	1.09718	0.854737
2.57475	1.10437	0.962105
2.57572	1.10183	0.924211
2.61942	1.10732	1.00632
2.62119	1.10268	0.936842
2.66071	1.11915	1.18316
2.66506	1.10775	1.01263
2.66619	1.10479	0.968421
2.68941	1.10394	0.955789
2.70747	1.11662	1.14526
2.73376	1.10775	1.01263
2.73457	1.10563	0.981053
2.75634	1.10859	1.02526
2.75779	1.10479	0.968421
2.80472	1.10183	0.924211
2.85052	1.10183	0.924211
2.8731	1.10268	0.936842
2.91358	1.11662	1.14526
2.93841	1.11155	1.06947
2.98453	1.1107	1.05684
3.02727	1.11873	1.17684
3.03324	1.1031	0.943158
3.03404	1.10099	0.911579
3.05759	1.0993	0.886316
3.08162	1.09634	0.842105
3.10323	1.09972	0.892632
3.12468	1.10352	0.949474
3.19563	1.09761	0.861053
3.21966	1.09465	0.816842
3.24434	1.09	0.747368
3.24498	1.08831	0.722105
3.26837	1.08704	0.703158
3.31175	1.09338	0.797895
3.37948	1.09592	0.835789
3.40706	1.08366	0.652632
3.47237	1.09254	0.785263
3.49043	1.10521	0.974737
3.49463	1.09423	0.810526
3.51656	1.09676	0.848421
3.54462	1.08324	0.646316
3.58026	1.10986	1.04421
3.60655	1.10099	0.911579
3.63235	1.09338	0.797895
3.65541	1.09296	0.791579
3.65638	1.09042	0.753684
3.67638	1.09803	0.867368
3.67928	1.09042	0.753684
3.70057	1.09465	0.816842
3.7225	1.09718	0.854737
3.74782	1.09085	0.76
3.78669	1.10901	1.03158
3.84281	1.08197	0.627368
3.86377	1.08704	0.703158
3.87442	1.11915	1.18316
3.8857	1.08958	0.741053
3.92909	1.09592	0.835789
3.95295	1.09338	0.797895
3.99795	1.09549	0.829474
4.02391	1.08746	0.709474
4.04488	1.09254	0.785263
4.06552	1.09845	0.873684
4.11874	1.07901	0.583158
4.13825	1.08789	0.715789
4.18131	1.09507	0.823158
4.20663	1.08873	0.728421
4.22598	1.09803	0.867368
4.23243	1.08113	0.614737
4.25695	1.0769	0.551579
4.29855	1.08789	0.715789
4.30275	1.0769	0.551579
4.45176	1.10648	0.993684
4.48305	1.08451	0.665263
4.52723	1.08873	0.728421
4.55142	1.08535	0.677895
4.55207	1.08366	0.652632
4.57545	1.08239	0.633684
4.59593	1.08873	0.728421
4.59738	1.08493	0.671579
4.59787	1.08366	0.652632
4.614	1.10141	0.917895
4.64222	1.08746	0.709474
4.64464	1.08113	0.614737
4.64512	1.07986	0.595789
4.66576	1.08577	0.684211
4.66609	1.08493	0.671579
4.66979	1.07521	0.526316
4.68673	1.09085	0.76
4.71511	1.07648	0.545263
4.73188	1.09254	0.785263
4.73285	1.09	0.747368
4.75607	1.08915	0.734737
4.7564	1.08831	0.722105
4.78204	1.08113	0.614737
4.80058	1.09254	0.785263
4.82494	1.08873	0.728421
4.85009	1.08282	0.64
4.87412	1.07986	0.595789
4.87493	1.07775	0.564211
4.89057	1.09676	0.848421
4.8946	1.0862	0.690526
4.89912	1.07437	0.513684
4.9196	1.0807	0.608421
4.94073	1.08535	0.677895
4.94202	1.08197	0.627368
4.94315	1.07901	0.583158
4.96218	1.08915	0.734737
4.96588	1.07944	0.589474
4.99975	1.1107	1.05684
5.01023	1.08324	0.646316
5.01072	1.08197	0.627368
5.0112	1.0807	0.608421
5.037	1.0731	0.494737
5.05797	1.07817	0.570526
5.05974	1.07352	0.501053
5.0791	1.08282	0.64
5.082	1.07521	0.526316
5.1278	1.07521	0.526316
5.1528	1.06972	0.444211
5.1715	1.0807	0.608421
5.17489	1.07183	0.475789
5.19698	1.07394	0.507368
5.1986	1.06972	0.444211
5.19892	1.06887	0.431579
5.23924	1.08324	0.646316
5.26246	1.08239	0.633684
5.26439	1.07732	0.557895
5.26472	1.07648	0.545263
5.26504	1.07563	0.532632
5.28713	1.07775	0.564211
5.28923	1.07225	0.482105
5.311	1.07521	0.526316
5.31197	1.07268	0.488421
5.33277	1.07817	0.570526
5.33696	1.06718	0.406316
5.35535	1.07901	0.583158
5.36019	1.06634	0.393684
5.37857	1.07817	0.570526
5.38067	1.07268	0.488421
5.38099	1.07183	0.475789
5.40325	1.07352	0.501053
5.42486	1.0769	0.551579
5.4276	1.06972	0.444211
5.46904	1.08113	0.614737
5.51823	1.07225	0.482105
5.51871	1.07099	0.463158
5.5621	1.07732	0.557895
5.56806	1.06169	0.324211
5.58693	1.07225	0.482105
5.5879	1.06972	0.444211
5.5908	1.06211	0.330526
5.63015	1.07901	0.583158
5.65434	1.07563	0.532632
5.65821	1.06549	0.381053
5.67934	1.07014	0.450526
5.67998	1.06845	0.425263
5.68079	1.06634	0.393684
5.74578	1.07606	0.538947
5.7461	1.07521	0.526316
5.79384	1.07014	0.450526
5.79465	1.06803	0.418947
5.81529	1.07394	0.507368
5.83754	1.07563	0.532632
5.84045	1.06803	0.418947
5.8627	1.06972	0.444211
5.90802	1.07099	0.463158
5.95398	1.07056	0.456842
5.95704	1.06254	0.336842
5.99881	1.0731	0.494737
6.02397	1.06718	0.406316
6.04639	1.06845	0.425263
6.04864	1.06254	0.336842
6.06896	1.0693	0.437895
6.06961	1.06761	0.412632
6.0917	1.06972	0.444211
6.11493	1.06887	0.431579
6.13621	1.0731	0.494737
6.13638	1.07268	0.488421
6.16153	1.06676	0.4
6.18137	1.07479	0.52
6.20137	1.08239	0.633684
6.2304	1.06634	0.393684
6.24894	1.07775	0.564211
6.32022	1.07099	0.463158
6.34619	1.06296	0.343158
6.5489	1.07183	0.475789
6.55197	1.0638	0.355789
6.57422	1.06549	0.381053
6.59438	1.07268	0.488421
6.59777	1.0638	0.355789
6.61873	1.06887	0.431579
6.61938	1.06718	0.406316
6.64421	1.06211	0.330526
6.66534	1.06676	0.4
6.68743	1.06887	0.431579
6.68937	1.0638	0.355789
6.75839	1.06296	0.343158
6.78064	1.06465	0.368421
6.78226	1.06042	0.305263
6.8008	1.07183	0.475789
6.80451	1.06211	0.330526
6.82661	1.06423	0.362105
6.85015	1.06254	0.336842
6.85112	1.06	0.298947
6.87289	1.06296	0.343158
6.8966	1.06085	0.311579
6.91418	1.07479	0.52
6.91724	1.06676	0.4
6.94304	1.05915	0.286316
6.98223	1.07648	0.545263
7.00658	1.07268	0.488421
7.00852	1.06761	0.412632
7.03077	1.0693	0.437895
7.03416	1.06042	0.305263
7.07722	1.06761	0.412632
7.10076	1.06592	0.387368
7.1227	1.06845	0.425263
7.16769	1.07056	0.456842
7.1693	1.06634	0.393684
7.16963	1.06549	0.381053
7.17011	1.06423	0.362105
7.19059	1.07056	0.456842
7.21285	1.07225	0.482105
7.21688	1.06169	0.324211
7.21849	1.05746	0.261053
7.23994	1.06127	0.317895
7.24058	1.05958	0.292632
7.26187	1.0638	0.355789
7.26381	1.05873	0.28
7.28332	1.06761	0.412632
7.28622	1.06	0.298947
7.30799	1.06296	0.343158
7.31057	1.0562	0.242105
7.31074	1.05577	0.235789
7.33138	1.06169	0.324211
7.35121	1.06972	0.444211
7.3525	1.06634	0.393684
7.35347	1.0638	0.355789
7.35444	1.06127	0.317895
7.37411	1.06972	0.444211
7.37508	1.06718	0.406316
7.37573	1.06549	0.381053
7.40282	1.05451	0.216842
7.42104	1.06676	0.4
7.42137	1.06592	0.387368
7.44507	1.0638	0.355789
7.44717	1.05831	0.273684
7.46652	1.06761	0.412632
7.46684	1.06676	0.4
7.47055	1.05704	0.254737
7.49055	1.06465	0.368421
7.49168	1.06169	0.324211
7.492	1.06085	0.311579
7.56006	1.06254	0.336842
7.5828	1.06296	0.343158
7.60392	1.06761	0.412632
7.60554	1.06338	0.349474
7.60747	1.05831	0.273684
7.65101	1.06423	0.362105
7.67424	1.06338	0.349474
