# Supplementary material for: Physical basis of the cell size scaling laws
Source: eLife. 2023 May 2;12:e82490. doi: 10.7554/eLife.82490 (PMC10266764; doi:10.7554/eLife.82490)
Supplement: Figure 4—source data 1. [file elife-82490-fig4-data1.xlsx]

## Sheet: Chalut_Nucleus_Volume
Figure 4 - panel D (extracted from Fig 3 in Finan et al, Ann Biomed Eng., 2009)
n0iso/n0	Vn/Vniso
0.783738	0.805706
1.00143	1.00114
1.35093	1.14237
1.59658	1.17518
1.76034	1.20086
1.89215	1.2087
